# Supplementary material for: Deciphering Chitosan–Host Plant Interaction in Esca Disease
Source: MDPI journal article supplement (doi:10.3390/agronomy13051290), 2023-04-30
Supplement: s1 [file s1]

**Table S1.** Grapevine productivity, including number of bunches, bunch weight and Ravaz index, after chitosan application in an open-field scenario.

| Treatment       | Year   | Number of bunches      | Bunch weight (g) | Ravaz index   |
|-----------------|--------|------------------------|------------------|---------------|
| Control         | Year 2 | 5.85 ± 0.32            | 384.90 ± 21.67   | 2.67 ± 0.23   |
| Chitosan        |        | 7.10 ± 0.17            | 341.11 ± 37.30   | 2.71 ± 0.39   |
| Control         | Year 3 | 6.10 ± 0.29            | 408.50 ± 08.95   | 3.89 ± 0.46   |
| Chitosan        |        | 6.85 ± 0.44            | 414.25 ± 21.80   | 4.48 ± 0.67   |
| ANOVA (P-value) |        |                        |                  |               |
| Treatment (T)   |        | 13.93 ( <b>0.003</b> ) | 0.60 (0.454)     | 0.46 (0.510)  |
| Year (Y)        |        | 0.28 (0.60)            | 3.87 (0.073)     | 10.24 (0.076) |
| T x Y           |        | 2.09 (0.173)           | 1.02 (0.334)     | 0.34 (0.571)  |

Mean ± standard error (n=20). The significance of the effects of the chitosan treatment, year and their interaction on the measured variables is also shown (F-values (P-values)).
